# Supplementary material
Source: HighWire-hosted journal article supplement (http://www.cmaj.ca/highwire/filestream/58860/field_highwire_adjunct_files/3/cardio-garg-4-at.pdf)
Supplement: cardio-garg-4-at.pdf [file cardio-garg-4-at.pdf]

**Appendix 4.** Definition of baseline characteristics using diagnostic and procedural codes

| Characteristic                                                                                                                                | Database                                              | Codes                                                                                                                                                                                                                                                                                                                                                                                                                 |
|-----------------------------------------------------------------------------------------------------------------------------------------------|-------------------------------------------------------|-----------------------------------------------------------------------------------------------------------------------------------------------------------------------------------------------------------------------------------------------------------------------------------------------------------------------------------------------------------------------------------------------------------------------|
| Age                                                                                                                                           | RPDB                                                  |                                                                                                                                                                                                                                                                                                                                                                                                                       |
| Sex                                                                                                                                           | RPDB                                                  |                                                                                                                                                                                                                                                                                                                                                                                                                       |
| Neighbourhood income                                                                                                                          | RPDB                                                  | Neighborhood income quintiles were defined using methods developed at Statistics Canada based on 2001 Dissemination Areas, which are the smallest geographic areas for which Canadian population data are released. This indicator is a household size-adjusted measure of income adequacy based on Census summary data for each Dissemination Area, which have average population sizes of 400 to 700. <sup>50</sup> |
| Echocardiograms                                                                                                                               | CIHI (CCI)<br>CIHI (CCP)<br>OHIP-Fee                  | 2HZ23<br>02.82<br>G111, G112, G315                                                                                                                                                                                                                                                                                                                                                                                    |
| Stress Tests                                                                                                                                  | CIHI (CCI)<br>CIHI (CCP)<br>OHIP-Fee                  | 2HZ08<br>3.41-3.44<br>G560-G562, G566-G578                                                                                                                                                                                                                                                                                                                                                                            |
| Diabetes                                                                                                                                      | Identification in the Ontario Diabetes Database (ODD) |                                                                                                                                                                                                                                                                                                                                                                                                                       |
| COPD                                                                                                                                          | Identification in the COPD dataset                    |                                                                                                                                                                                                                                                                                                                                                                                                                       |
| Hypertension                                                                                                                                  | CIHI (ICD-9)                                          | 401.0-405.9                                                                                                                                                                                                                                                                                                                                                                                                           |
|                                                                                                                                               | CIHI (ICD-10)                                         | I10-I13, I15                                                                                                                                                                                                                                                                                                                                                                                                          |
|                                                                                                                                               | OHIP-Dx                                               | 401-402                                                                                                                                                                                                                                                                                                                                                                                                               |
| Validated ICES algorithm used: Diagnosis present in the discharge abstract of any hospitalization OR at least two physician outpatient claims |                                                       |                                                                                                                                                                                                                                                                                                                                                                                                                       |
| Hypercholesterolemia                                                                                                                          | CIHI (ICD-9)                                          | 272.0-272.9                                                                                                                                                                                                                                                                                                                                                                                                           |
|                                                                                                                                               | CIHI (ICD-10)                                         | E78                                                                                                                                                                                                                                                                                                                                                                                                                   |
|                                                                                                                                               | OHIP-Dx                                               | 272                                                                                                                                                                                                                                                                                                                                                                                                                   |
| Chronic kidney diseases                                                                                                                       | CIHI (ICD-9) <sup>††</sup>                            | 582-582.9, 583-583.7, 586, 585, 588-588.9                                                                                                                                                                                                                                                                                                                                                                             |
|                                                                                                                                               | CIHI (ICD-10) <sup>‡</sup>                            | N01 N03 N18 N19 N25 N052 N053 N054 N055 N056 N072 N073 N074                                                                                                                                                                                                                                                                                                                                                           |
|                                                                                                                                               | OHIP-Dx                                               | 403, 584, 580, 581, 585, 593, 788                                                                                                                                                                                                                                                                                                                                                                                     |
|                                                                                                                                               | CIHI (CCP)                                            | 51.27, 51.42, 51.43, 51.95, 66.98                                                                                                                                                                                                                                                                                                                                                                                     |
|                                                                                                                                               | CIHI (CCI)                                            | 1OT53DATS, 1OT53HATS, 1OT53LATS, 1PZ21HPD4 ,1PZ21HQBR, 1SY55LAFT, 7SC59QD, 1KY76LA, 1KY76LASJ, 1KY76LAXXA, 1KY76LAXXL, 1KY76LAXXN, 1KY80LA, 1KY80LAXXA, 1KY80LAXXK, 1KY80LAXXN, 1KG76MZXXA, 1KG76MZXXN                                                                                                                                                                                                                |
|                                                                                                                                               | OHIP-Fee                                              | R850, G324, G336, G325, G326, G327, G860, G862, G863, G865, G866, G099, R825, R826, R827, R833, R840, R841, R843, R848, R851, Z450, Z451, Z452, G332, G861, G864, R852, R853, R854, R885, G082, G083, G085, G090, G091, G092, G094, G096, G333, H540, H740                                                                                                                                                            |
| Validated ICES algorithm used: presence of any one of the codes above                                                                         |                                                       |                                                                                                                                                                                                                                                                                                                                                                                                                       |
| Psychiatric disorders                                                                                                                         | CIHI (ICD-9)                                          | 290.0-319                                                                                                                                                                                                                                                                                                                                                                                                             |
|                                                                                                                                               | CIHI (ICD-10)                                         | F000-F99                                                                                                                                                                                                                                                                                                                                                                                                              |
|                                                                                                                                               | OHIP-Dx                                               | 290-319                                                                                                                                                                                                                                                                                                                                                                                                               |

CCI= Canadian Classification of Health Interventions; CCP= Canadian Classification of Diagnostic, Therapeutic and Surgical Procedures; CIHI= Canadian institute for Health Information; ICD= International Classification of Diseases; OHIP-Dx= Ontario Health Insurance Plan Diagnostic codes; OHIP-Fee= Ontario Health Insurance Plan Fee codes; RPDB= registered persons database
